# Supplementary material for: Tuning peripheral group density in ternary phosphine oxide hosts for low-voltage-driven yellow PhOLEDs
Source: Royal Society of Chemistry journal article supplement (doi:10.1039/c5tc01179e), 2015-01-01
Supplement: c5tc01179e1.pdf [file c5tc01179e1.pdf]

## Supplementary Information

### Tuning Peripheral Group Density in Ternary Phosphine Oxide Hosts for Low-Voltage-Driven Yellow PhOLEDs

Jing Li,<sup>a</sup> Zhensong Zhang,<sup>b</sup> Chunmiao Han,<sup>ac</sup> Dongxue Ding,<sup>a</sup> Yi Zhao,<sup>\*b</sup> Wei Huang<sup>\*c</sup> and Hui Xu<sup>\*ac</sup>

<sup>a</sup> Key Laboratory of Functional Inorganic Material Chemistry, Ministry of Education, Heilongjiang University, 74 Xuefu Road, Harbin 150080, P. R. China

<sup>b</sup> State Key Laboratory on Integrated Optoelectronics, College of Electronics Science and Engineering, Jilin University, 2699 Qianjin Street, Changchun 130012, P. R. China

<sup>c</sup> Institute of Advanced Materials, Nanjing Tech University, 5 Ximofan Road, Nanjing 210009, P. R. China.

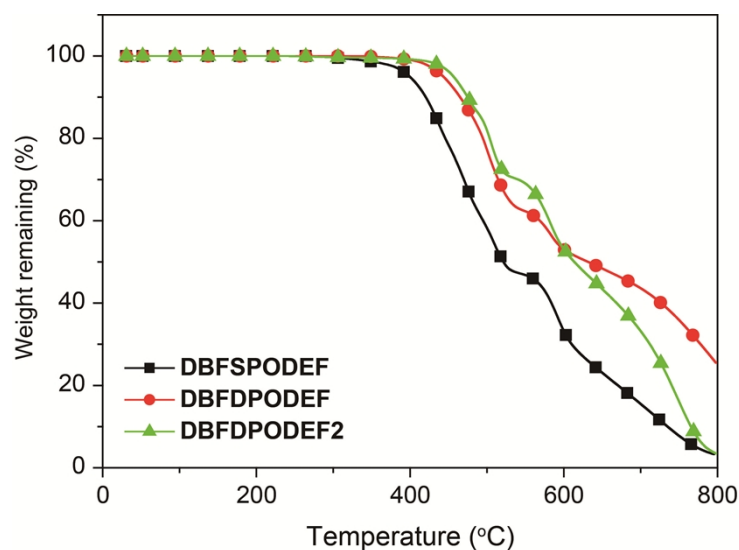

**Figure S1.** TGA curves of DBFxPODEF<sub>n</sub>.

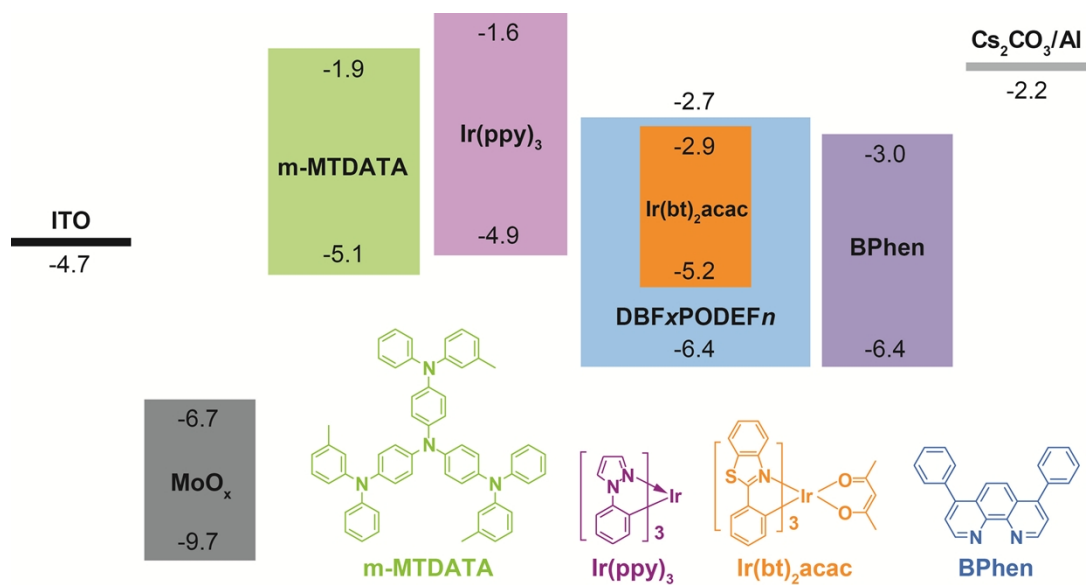

**Scheme S1.** Device structure and energy level scheme of yellow PhOLEDs based on DBFxPODEF<sub>n</sub> and the chemical structures of the involved materials.
